# Supplementary material for: Measurement report: Characterization of Aerosol Hygroscopicity over Southeast Asia during the NASA CAMP 2 Ex Campaign
Source: Copernicus journal article supplement (doi:10.5194/egusphere-2024-2604), 2024-10-01
Supplement: Supplementary file 1 [file egusphere-2024-2604-supplement.pdf]

1 **SUPPLEMENTAL**

2 **Table S1:** Assigned values of  $\kappa$  and density ( $\rho$ ) for compounds used in the hygroscopicity analysis  
 3 of CAM-chem model outputs and AMS and SP2 observations. (a: Peng et al. (2017); b: Bond et  
 4 al. (2013); c: Rose et al. (2010); d: Laborde et al. (2012); e: Fan et al., (2020); f: Sullivan et al.  
 5 (2009); g: Almeida et al. (2019) and references therein; h: Hersey et al. (2013); i: Pöschl et al.  
 6 (2019); j: Dusek et al. (2010); k: Aldaif et al. (2018); l: Schulze et al. (2020); m: Chang et al.  
 7 (2010); n: Kawana et al. (2016); o: Petters and Kreidenweis (2007); and p: Ren et al. (2022).

| Species                                                                         | $\kappa$              | $\rho$ (g cm <sup>-3</sup> ) |
|---------------------------------------------------------------------------------|-----------------------|------------------------------|
| <b>Black Carbon (Aged)</b>                                                      | 0.035 <sup>a</sup>    | 1.8 <sup>b</sup>             |
| <b>Black Carbon (Primary)</b>                                                   | 0.00 <sup>c,d</sup>   | 0.45 <sup>e</sup>            |
| <b>Dust (AlSiO<sub>3</sub>)</b>                                                 | 0.001 <sup>f</sup>    | 3.8                          |
| <b>NaCl</b>                                                                     | 1.24 <sup>g</sup>     | 2.16                         |
| <b>Organics (Aged)</b>                                                          | 0.10 <sup>h,i,j</sup> | 1 <sup>k</sup>               |
| <b>Organics (Primary)</b>                                                       | 0 <sup>l</sup>        | 1 <sup>k</sup>               |
| <b>Secondary Organic Aerosol (C<sub>15</sub>H<sub>38</sub>O<sub>2</sub>)</b>    | 0.15 <sup>m,n</sup>   | 1.4                          |
| <b>Sulfate as Ammonium Sulfate ((NH<sub>4</sub>)<sub>2</sub>SO<sub>4</sub>)</b> | 0.61 <sup>o</sup>     | 1.77                         |
| <b>Sulfate as Ammonium Bisulfate (NH<sub>4</sub>HSO<sub>4</sub>)</b>            | 0.56 <sup>p</sup>     | 1.78                         |

8  
9

## 10 **S1. CAM-chem Model Configuration**

11 The Community Atmosphere Model coupled with chemistry (CAM-chem) is a component of the  
12 Community Earth System Model (CESM2.2) that represents the dynamics, physics, and chemistry  
13 of the atmosphere. The Multi-Scale Infrastructure for Chemistry and Aerosols (MUSICA) is a  
14 configuration of CAM-chem, it is a next generation unified infrastructure to study atmospheric  
15 chemistry at different horizontal grid resolutions. It is community-built, open-source, flexible, and  
16 computationally efficient. MUSICA uses a modular approach within a unified framework to  
17 represent aerosol and gaseous chemistry at smaller scales, where exposures are significant, while  
18 being able to simulate their effects at a larger scale, such as on radiation which is important for  
19 climate.

20 For the simulations performed here, CAM-chem is fully coupled to the land and prescribes  
21 observed sea-surface temperatures and sea-ice. CAM-chem includes comprehensive tropospheric  
22 and stratospheric chemistry (Emmons et al., 2020). CAM-chem includes the Modal Aerosol Model  
23 (MAM4) and a Volatility Basis Set description with gas-phase SOA precursors (VBS-SOA) to  
24 simulate secondary organic aerosols (Tilmes et al., 2019; Emmons et al., 2020; and references  
25 therein).

26 MAM4 has four aerosol modes: Aitken, accumulation, coarse, and primary carbon which considers  
27 elemental and organic carbon aging (Liu et al., 2016). Köhler theory is used to determine water  
28 uptake and wet diameter in the troposphere from the relative humidity and volume mean  
29 hygroscopicity per mode, and through which, with altitude information, the gravitational settling  
30 velocities can be calculated. Information on how MAM4 treats nucleation, coagulation,  
31 condensation, and evaporation in general, as well as water uptake and settling velocity calculations  
32 from are described by Liu et al., (2016) and Liu et al., (2012).

33 The Volatility Basis Set (VBS) models organic aerosol evolution by categorizing organic aerosol  
34 particles by their volatilities, which affects their partitioning and condensation characteristics  
35 (Hodzic et al., 2016). VBS-SOA includes a comprehensive parameterization which includes  
36 updated removal mechanisms and the interaction of SOA with biogenics. This enables the  
37 identification of SOA precursors from biomass burning, anthropogenic sources, and biogenic  
38 emissions. Details about VBS-SOA can be found in Tilmes et al. (2019).

39 Here, we are evaluating different horizontal resolutions of CAM-chem and MUSICA version 0  
40 where both employ a spectral element (SE) dynamical core that allows regional refinement for up  
41 to  $0.0625^\circ$  from its default  $1^\circ$  ( $\sim 111$  km) resolution in a specified region of the world. The available  
42 regional refined grids were created by users for a variety of applications. We used a  $1^\circ$  base grid  
43 resolution (ne30) and a  $0.25^\circ$  (ne30x4) regionally refined output grid (which we label MUSICA)  
44 for East Asia that was developed at the NSF National Center for Atmospheric Research  
45 (NCAR)/Atmospheric Chemistry Observations and Modeling Laboratory (ACOM).

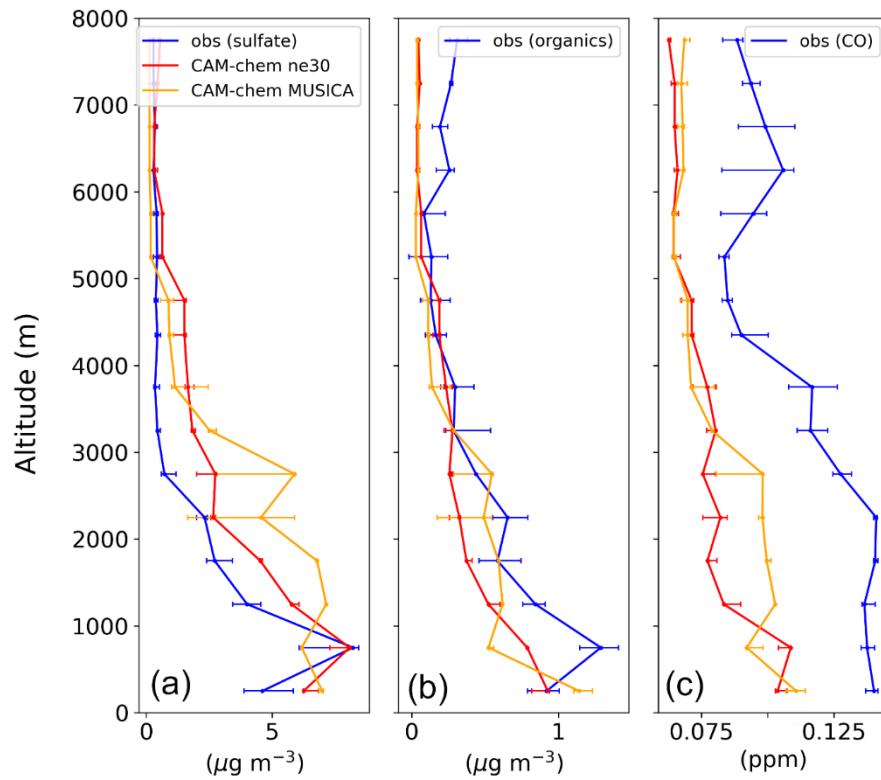

46

47 **Figure S1.** Vertical profiles of observed data (01:53 to 06:20 UTC) and CAM-chem model outputs  
 48 (06:00 UTC) for ne30  $\sim 1^\circ$  and MUSICA  $0.25^\circ$  grids for the tropical cyclone-induced convection  
 49 case on 20 September 2019 at 500 m intervals. (a) Submicron aerosol mass concentration for  $\text{SO}_4^{2-}$   
 50 and  $\text{NH}_4^+$  from AMS data and CAM-chem output sulfate ( $\text{NH}_4\text{HSO}_4$ ), (b) submicron aerosol mass  
 51 concentration for organics from AMS data and CAM-chem, and (c) total CO concentration from  
 52 observations and CAM-chem. The lines correspond to the median values of data in the given  
 53 altitude intervals and the bars correspond to the 25<sup>th</sup> and 75<sup>th</sup> percentile values.

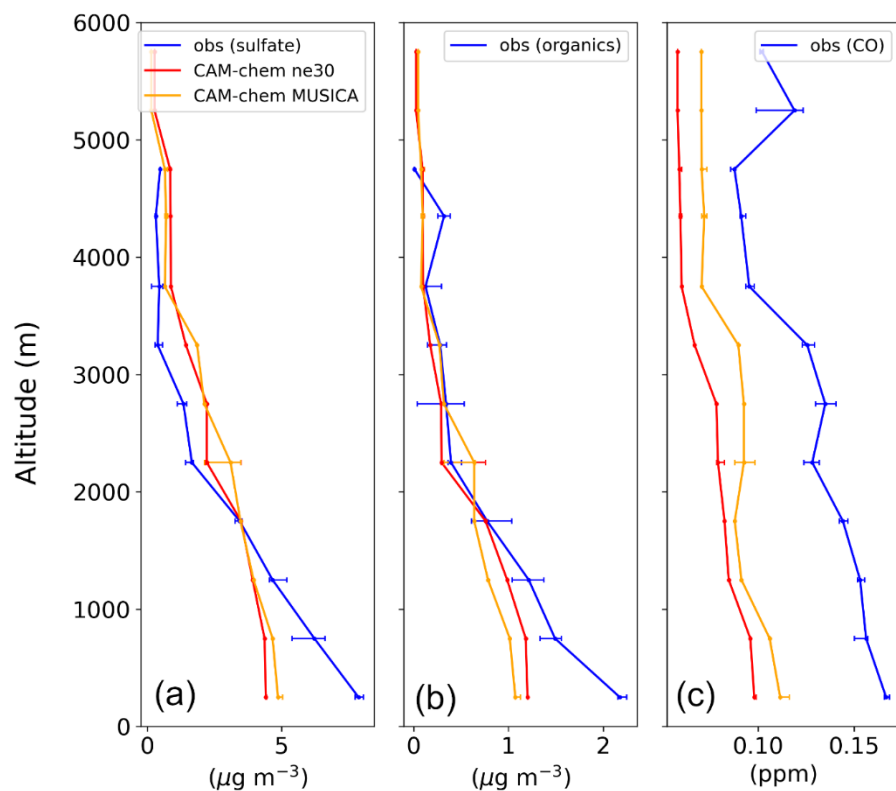

54

55 **Figure S2.** Vertical profiles of observed data (02:55 to 06:02 UTC) and CAM-chem model outputs  
 56 (06:00 UTC) for ne30  $\sim 1^\circ$  and MUSICA  $0.25^\circ$  grids for the shallow convection case on 24  
 57 September 2019. (a) Submicron aerosol mass concentration for  $\text{SO}_4^{2-}$  and  $\text{NH}_4^+$  from AMS data  
 58 and CAM-chem output sulfate ( $\text{NH}_4\text{HSO}_4$ ), (b) submicron aerosol mass concentration for organics  
 59 from AMS data and CAM-chem, and (c) total CO concentration from observations and CAM-  
 60 chem. The lines correspond to the median values of data in the given altitude intervals and the bars  
 61 correspond to the 25<sup>th</sup> and 75<sup>th</sup> percentile values.
